# Supplementary material for: Towards Implementation of Context-specific Integrated District Mental Health Care Plans: A Situation Analysis of Mental Health Services in Five Districts in Ghana
Source: Research Square preprint supplement (doi:10.21203/rs.3.rs-1175369/v1), 2021-12-21
Supplement: Supplementary file 1 [file 0010fd4b107c5379a5d35fbd.docx]

**Tables**

**Table 1: Selected socio-demographic characteristics by situation analysis district**

| Indicator | Tolon | Bongo | Ahanta West | Asunafo North | Anloga* |
| --- | --- | --- | --- | --- | --- |
| District population (2020 projection) | 92,072 | 105,206 | 141,344 | 157,732 | 99,996 |
| % rural | 88.4% | 99.9% | 70.5% | 60.0% | 46.7% |
| Women in fertility age (WIFA) | 21,645 (46.5%) | 25,249 (24.0%) | 35,302  (25.0%) | 38,980  (24.7%) | 24,004  (23.0%) |
| Fertility rate | 3.2 | 4.0 | 3.9 | 3.9 | 3.8 |
| Sex ratio (female: male) | 100:99 | 100:90 | 100:92 | 100:102 | 100:87 |
| Average household (HH) size | 9 | 5.5 | 4 | 4.6 | 3.8 |
| Ethnic diversity | 1 major (98.2%) | 2 major (94.3%) | 1 major | 1 major  (79.0%) | 1 major (98.7%) |
| Religious diversity |  |  |  |  |  |
| Christianity | 3.7% | 28.3% | 78.6% | 77.8% | 59.9% |
| Islam | 94.1% | 6.4% | 3.2% | 14.9% | 1% |
| Traditional | 1.5% | 53.6% | 1.6% | 0.7% | 25.4% |
| No religion | 0.5% | 11.7% | 15.9% | 5.9% | 12.9% |
| Literacy (% who can read and write English and Ghanaian language only) | 73.8% | 33.2% | 50.6% | 70.8% | 75.1% |
| % of households with electricity | 32.9% | 11.5% | 70.9% | 93.1% | 41.8% |
| % of households with a functioning latrine | 10.5% | 20% | 20.3% | 38.6% | 57.0% |
| % of households with clean water supply | 49.0% | 70% | 60.1% | 72.7% | 79.6% |

* *Except population projection and WIFA all other information is based on that of Keta Municipal since Anloga District was created in 2019 from Keta and there is limited information on the district.*

**Table 2: Distribution of health facilities, human resources, and common diseases by situation analysis district**

| Indicator | Tolon | Bongo | Ahanta West | Asunafo North | Anloga |
| --- | --- | --- | --- | --- | --- |
| **Number and type of health facilities** |  |  |  |  |  |
| Hospital | 1 (just commissioned not functional) | 1 | 1 | 4 (1 Govt[[1]](#footnote-1); 1 CHAG; 2 Private) | 0 |
| Clinic/community clinic with a medical officer | 2 (1 private; 1 UDS) | 0 | 2 | 0 | 0 |
| Health centres | 4 Govt | 7 (6 Govt, 1 CHAG) | 5 Govt | 11 (1 CHAG, 7 Govt and 3 Private) | 6 Govt |
| CHPS with compounds | 14 | 22 | 36 | 11 | 4 |
| Outreach points | 120 | 69 | 110 | 78 | Not provided |
| Others | 0 | 6[[2]](#footnote-2) | 0 | 0 | 0 |
| Hard to reach areas for health service delivery | Yes (36 communities) | Yes ([[3]](#footnote-3) communities) | None | Yes (13 communities) | None |
| **Human resources for health (general health workers)** |  |  |  |  |  |
| Medical officers | 0 | 2 | 5 | 8 | 0 |
| Public health nurse | 1 | 1 | 1 | 2 | 0 |
| Midwives | 20 | 46 | 50 | 91 | 13 |
| Community Health Nurse | 40 | 111 | 98 | 67 | 27 |
| Staff/enrolled nurses (degree, diploma & certificate) | 135 | 253 | 128 | 134 | 54 |
| Physician Assistants (medical) | 2 | 11 | 6 | 8 | 3 |
| Physician Assistants (anaesthetics) | 0 | 3 | 0 | 0 | 0 |
| Health information officers | 2 | 4 | 3 | 6 | 1 |
| Disease control officers (TO/FT) | 5 | 8 | 3 | 10 | 3 |
| Nutrition officers | 5 | 5 | 1 |  | 1 |
| Health promotion officers | 2 | 2 | 2 | 0 | 1 |
| Accountant | 2 | 2 | 2 | 2 | 1 |
| Ophthalmic nurse | 1 | 2 | 0 | 0 | 1 |
| Staff Total | 215 | 450 | 299 | 328 | 105 |
| **Top five reasons for outpatient visits** |  |  |  |  |  |
|  | Malaria (all categories) | Malaria (all categories) | Malaria (all categories) | Malaria (all categories) | Malaria (all categories) |
|  | URTI | URTI | URTI | Diarrhea diseases | Rheumatism / other Joint pains / arthritis |
|  | Diarrhoea diseases | Diarrhoea diseases | Anaemia | URTI | Anaemia |
|  | Rheumatism / other joint pains / arthritis | Typhoid fever | Diarrhoea diseases | Anaemia | URTI |
|  | Acute urinary tract infection | Septicaemia | Intestinal worms | Intestinal worms | Intestinal worms |
| MNS disorders in top 10 outpatient visits | No | No | No | No | No |

Govt=Government; CHAG=Christian Health Association of Ghana; UDS=University for Development Studies; TO/FT: Technical Officer/Field Technician; URTI=Urinary and reproductive tract infections; MNS=Mental, Neurological and Substance use disorders

**Table 3: Organisation of mental health services, mental health professionals and type of mental health services by situation analysis district**

|  | Tolon | Bongo | Ahanta West | Asunafo North | Anloga |
| --- | --- | --- | --- | --- | --- |
| **Mental health service organisation** |  |  |  |  |  |
| District mental health plan or implementation of national mental health plan | No district mental health plan  Implementation based on routine service and activities determined and funded nationally  Some mental health activities added to annual plans of the District Health Directorate | | | | |
| Budget for mental health (% of district health budget) | No specific district budget allocated to mental health  Activity budgets from regional through national and MHA | | | | |
| Mental health coordinator | Yes, but known as district mental health focal persons based at district and sub-district levels  The district mental health focal person is usually part of the District Health Management Team. | | | | |
| Mental health is part of PHC basic packages | Yes  implementation not comprehensive | Yes  good progress with implementation. E.g. some staff trained in mhGAP | Yes  limited to facilities that have Mental Health Professionals (MHPs) | Yes  limited to the facilities that have MHPs | Yes  limited to facilities with MHPs |
| Screening tools for MNS disorders | Available  Midwives and some CHNs have tool for depression screening | Available  Depression screening tool | Not available  MHP usually go to the internet to search | Not available  Use what was learnt in school | Available, but limited, not enough |
| **Personnel type** |  |  |  |  |  |
| Neurologist | 0 | 0 | 0 | 0 | 0 |
| Psychiatrist | 0 | 0 | 0 | 0 | 0 |
| Clinical Psychiatric Officer | 1 | 1 | 0 | 0 | 0 |
| Psychiatric Nurse | 4 | 0 | 10 | 9 | 3 |
| Community Mental Health Officers | 2 (on study leave) | 5 | 0 | 1 | 1 |
| Clinical Psychologists | 0 | 0 | 0 | 0 | 0 |
| Occupational Therapists | 0 | 0 | 0 | 0 | 0 |
| Community Psychiatric Nurse | 0 | 0 | 0 | 0 | 3 |
| Counsellor | 0 | 0 | 0 | 0 | 0 |
| Registered Mental Health Nurse | 0 | 7 | 0 | 8 | 0 |
| Others | 0 | 0 | 0 | 0 | 0 |
| In-service training on mental health | 24 CHN and 3 midwives trained in depression management  12 staff trained in mental health reporting | 7 staff trained (can’t remember content) | None in the last 2 years | 5 days mhGAP training (7 staff) | No training in the last 2 years |
| **Availability/type of mental health services** |  |  |  |  |  |
| Outpatient mental health facilities | All health centres provide basic diagnosis and treatment of minor cases. Three health centres with MHPs provide more detailed services. | Six health centres and district hospital provide diagnosis and treatment of minor cases. | Basic diagnosis and treatment provided in District hospital and all subdistricts | District hospital and six out of 11 health centres with MHPs provide basic diagnosis and treatment of cases | Only two health centres provide mental health services |
| Psychosocial interventions | Across districts, psychosocial interventions offered include: supportive counselling; behaviour activation, cognitive behaviour, motivation enhancing therapies | | | | |
| Alcohol detoxification | Yes (if institutionalisation is not required) | | | Yes (able to hospitalise for 2 to 3 days if no improvement then refer) | Yes (if institutionalisation is not required) |
| Mental health rehabilitation | Not offered | Not offered | Not offered | Not offered | Not offered |
| Inpatient services in the district | No inpatient services | Yes (no dedicated beds) | | | No inpatient services |
| Nearest mental health inpatient facility | Tamale Teaching Hospital (22km away) | Regional Hospital (15km); Private facilityin the regional capital (15km); Tamale Teaching Hospital (175km away); | Ankaful Psychiatric Hospital (about 160km away) | Sunyani Regional Hospital (84km away) | Accra Psychiatric (165kms) or Pantang Psychiatric (172kms) Hospitals |
| Specialist inpatient for alcohol detoxification | Accra or Pantang Psychiatric Hospitals | | Ankaful Psychiatric Hospital | | Accra or Pantang Psychiatric Hospitals |
| Outreach services for patients with severe mental illness (SMI) | SMI treated at home with the support of families. Families educated to take care of them so that they don’t get leave home. Community volunteers trained under the "WHO fight against epilepsy” support the families | SMI treated at home with the support of families. Families educated to take care of them so that they don’t get lost. | SMI are treated at home and on OPD basis. Families educated to keep them at home. Many lost to follow-up because of few follow-up visits. MHPs use their own money for transport when going for visit. A lot of SMI relapse when medication is used up and they are unable to afford | Stabilise at hospital and treatment continued at home. Family counselled on importance of family support. Outreach services are generally limited in district because of lack of logistics and funding for mental health activities. The few outreach services are provided by MHPs at the subdistrict level | SMI are treated at home. They may come in for OPD services once in a while. Families counselled to help keep them at home |

**Table 4: Actual and population standardised newly registered patients in the most recent year (2020) by situation analysis district.**

| **MNS** | **Tolon** | | **Bongo** | | **Ahanta**  **West** | | **Asunafo North** | | **Anloga** | |
| --- | --- | --- | --- | --- | --- | --- | --- | --- | --- | --- |
|  | **New cases** | **Per 100,**  **000**  **population** | **New cases** | **Per 100,**  **000**  **population** | **New cases** | **Per 100,**  **000**  **population** | **New cases** | **Per 100,**  **000**  **population** | **New cases** | **Per 100,**  **000**  **population** |
| **Schizophrenia** | 07 | <0.1 | 79 | 0.25 | 19 | <0.1 | 10 | <0.1 | 69 | 0.23 |
| **Depression** | 02 | <0.1 | 36 | 0.11 | 12 | <0.1 | 08 | <0.1 | 03 | <0.1 |
| **Epilepsy** | 43 | 0.15 | 80 | 0.25 | 29 | <0.1 | 28 | <0.1 | 50 | 0.16 |
| **Bipolar** | 0 | <0.1 | 02 | <0.1 | 0 | <0.1 | 08 | <0.1 | 03 | <0.1 |
| **Mental disorders due to alcohol use** | 0 | <0.1 | 20 | <0.1 | 16 | <0.1 | 08 | <0.1 | 07 | <0.1 |
| **Mental disorders due to substance use** | 0 | <0.1 | 16 | <0.1 | 06 | <0.1 | 04 | <0.1 | 11 | <0.1 |
| **Delirium** | 0 | <0.1 | 04 | <0.1 | 0 | <0.1 | 36 | <0.1 | 01 | <0.1 |
| **Dementia** | 0 | <0.1 | 01 | <0.1 | 05 | <0.1 | 09 | <0.1 | 03 | <0.1 |
| **GAD** | 0 | <0.1 | 09 | <0.1 | 05 | <0.1 | 04 | <0.1 | 03 | <0.1 |
| **Intellectual impairment** | 0 | <0.1 | 05 | <0.1 | 01 | <0.1 | 10 | <0.1 | 01 | <0.1 |
| **Other mental disorders** | 0 | <0.1 | 06 | <0.1 | 26 | <0.1 | 67 | 0.14 | 06 | <0.1 |

GAD: Generalised Anxiety Disorder

**Table 5: Estimated prevalence and treatment coverage for top-3 mental health conditions by situation analysis district in the most recent year 2020**

| **MNS** | **Tolon** | | **Bongo** | | **Ahanta**  **West** | | **Asunafo North** | | **Anloga** | | **GBD study 2019** |
| --- | --- | --- | --- | --- | --- | --- | --- | --- | --- | --- | --- |
|  | **Popn Prevalence (%)** | **Treatment coverage (%)** | **Popn Prevalence** | **Treatment coverage** | **Popn Prevalence** | **Treatment coverage** | **Popn Prevalence** | **Treatment coverage** | **Popn Prevalence** | **Treatment coverage** | **Popn Prevalence** |
| **Schizophrenia** | 0.13 | 0.69 | 0.2 | 1.03 | 0.08 | 0.38 | 0.03 | 0.16 | 0.07 | 0.34 | 0.2 |
| **Depression** | <0.01 | <0.01 | 0.11 | 0.03 | 0.03 | <0.01 | 0.01 | <0.01 | <0.01 | <0.01 | 3.9 |
| **Epilepsy** | 0.45 | 1.04 | 0.25 | 0.58 | 0.09 | 0.23 | 0.05 | 0.12 | 0.05 | 0.12 | 0.6 |
| **Overall coverage** |  | 0.58 |  | 0.55 |  | 0.21 |  | 0.09 |  | 0.15 |  |

**Table 6: Commonly used psychotropic medications by situation analysis district**

| Antipsychotic group | Usual medications used | Tolon | Bongo | Ahanta West | Asunafo North | Anloga |
| --- | --- | --- | --- | --- | --- | --- |
| Antipsychotics (po) | Risperidone | Yes | Yes | No | No | Yes |
| Olanzapine | No | No | Yes | No | Yes |
| Quetiapine | No | No | No | No | No |
| Antipsychotic depot | Fluphenazine decanoate | No | Yes | No | No | Yes |
| Haloperidol decanoate | No | No | No | No | Yes |
| Antidepressants | Fluoxetine | No | No | No | No | Yes |
|  | Amitriptyline | No | Yes | Yes | Yes | Yes |
| Anxiolytics | Diazepam | No | No | Yes | Yes | No |
| Mood-stabilisers | Carbamazepine | No | Yes | Yes | No | Yes |
| Antiepileptics | Carbamazepine | No | Yes | Yes | Yes | Yes |
|  | Phenobarbitone | Yes | Yes | Yes | Yes | Yes |

**Table 7: Commonly reported mental health indicators the district health information management system (DHIMS)**

| **Type of form** | **Reported indicators** | **Reporting frequency** |
| --- | --- | --- |
| **Mental health client status** | - % of mentally ill with active NHIS membership by sex - % of attempted suicide cases by sex - % of suicide by sex | Monthly |
| **Mental health community report** | - % of traditional and faith-based centres chaining mentally ill persons | Monthly |
| **Mental health report** | - Per Capita OPD attendance for Mental Health | Monthly |

**Table 8: Community support systems for mental health by district**

| Indicator | Tolon | Bongo | Ahanta West | Asunafo North | Anloga |
| --- | --- | --- | --- | --- | --- |
| Community volunteers | 72 serving 172 communities with general health activities, including mental health. | 246 serving 143 communities with general health activities, including mental health. | 90 serving 123 communities with general health activities, including mental health. | 170 serving 189 communities with general health activities, including mental health. | 35 serving 99 communities with general health activities, including mental health. |
| Mental health Support groups/ self help groups | Yes. They meet regularly and invite mental health professionals to provide education | | No self-help groups | | |
| Help seeking for mental health | Most go to TFBH first | Health facilities are now the first port of call. | TFBHs are usually the first port of call (about 90%) | Information unavailable | Clients visit TFBH centres before clinics |
| Traditional and faith-based healing sites | 11 TFBH centres.  Work collaboratively with mental health professionals to ensure client safety and provide psychotropics. | 15 TFBH centres, working closely with mental health professionals | 67 TFBH centres. Poor interaction with the MHPs. Some attempts have been made to work with TFBHs but there is lack of interest. | 3 TFBH centres. MHP working with only two. The others are not cooperative. | 4 TFBH centres in district. Limited interaction with mental health professionals. |
| Estimated % / number of mental health clients seen by traditional and faith-based healers | About 8% all registrants in the most recent year | Sees less than 1% of all registrants in the most recent year | About 15% of all registrants in the most recent year access services of TFBH | About 5% of all registrants in the most recent year access services of TFBH  The two TFBH sites currently have eight clients. | 25% of all registrants in the most recent year access services of TFBH |
| Family burden | Family burden is high. Families are generally poor and unable to afford psychotropic medications. | | | | |

1. [↑](#footnote-ref-1)
2. [↑](#footnote-ref-2)
3. [↑](#footnote-ref-3)
